# Supplementary material for: Visible-light-active type-II heterojunction CdS@Cu0.5Mg2.5SnS4 composites for the efficient removal of brilliant green dye
Source: Royal Society of Chemistry journal article supplement (doi:10.1039/d4nj03782k), 2024-01-01
Supplement: d4nj03782k1.pdf [file d4nj03782k1.pdf]

## Supplementary information

### Visible-light-active type-II heterojunction CdS@Cu<sub>0.5</sub>Mg<sub>2.5</sub>SnS<sub>4</sub> composites for the efficient removal of brilliant green dye

Ashmalina Rahman<sup>1</sup>, Fazlurrahman Khan<sup>2,3,4</sup>, James Robert Jennings<sup>5,6</sup>, Young-Mog Kim<sup>3,4,7</sup>,  
Mohammad Mansoob Khan<sup>1,6\*</sup>

<sup>1</sup>Chemical Sciences, Faculty of Science, Universiti Brunei Darussalam, Jalan Tungku Link, Gadong, BE 1410, Brunei Darussalam.

<sup>2</sup>Ocean and Fisheries Development International Cooperation Institute, Pukyong National University, Busan 48513, Republic of Korea.

<sup>3</sup>Marine Integrated Biomedical Technology Center, The National Key Research Institutes in Universities, Pukyong National University, Busan 48513, Republic of Korea.

<sup>4</sup>Research Center for Marine Integrated Bionics Technology, Pukyong National University, Busan 48513, Republic of Korea.

<sup>5</sup>Applied Physics, Faculty of Science, Universiti Brunei Darussalam, Jalan Tungku Link, Gadong, BE 1410, Brunei Darussalam.

<sup>6</sup>Optoelectronic Device Research Group, Universiti Brunei Darussalam, Jalan Tungku Link, Gadong, BE 1410, Brunei Darussalam.

<sup>7</sup>Department of Food Science and Technology, Pukyong National University, Busan 48513, Republic of Korea.

\*Email: [mmansoobkhan@yahoo.com](mailto:mmansoobkhan@yahoo.com) and [mansoob.khan@ubd.edu.bn](mailto:mansoob.khan@ubd.edu.bn)

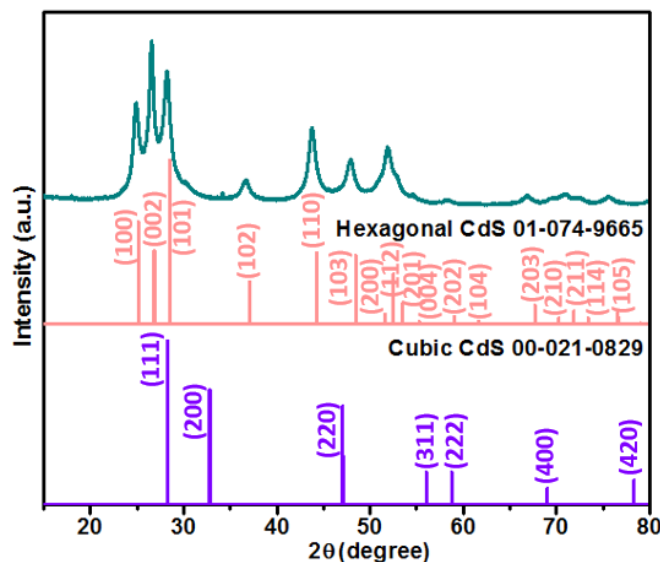

Figure S1. XRD patterns of CdS with different standards.

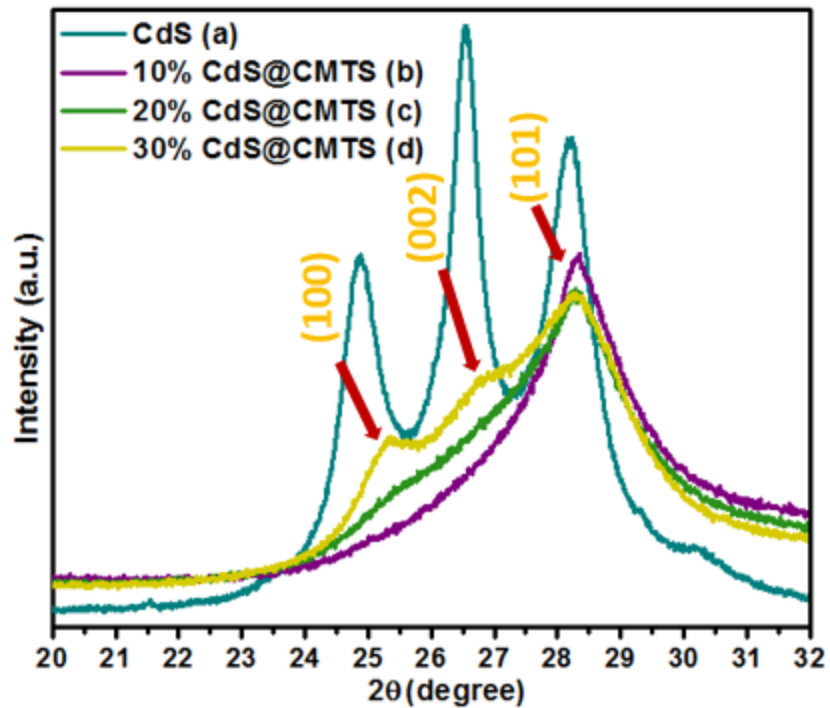

**Figure S2.** Overlaid XRD patterns of (a) CdS with (b) 10% CdS@CMTS, (c) 20% CdS@CMTS, and (d) 30% CdS@CMTS.

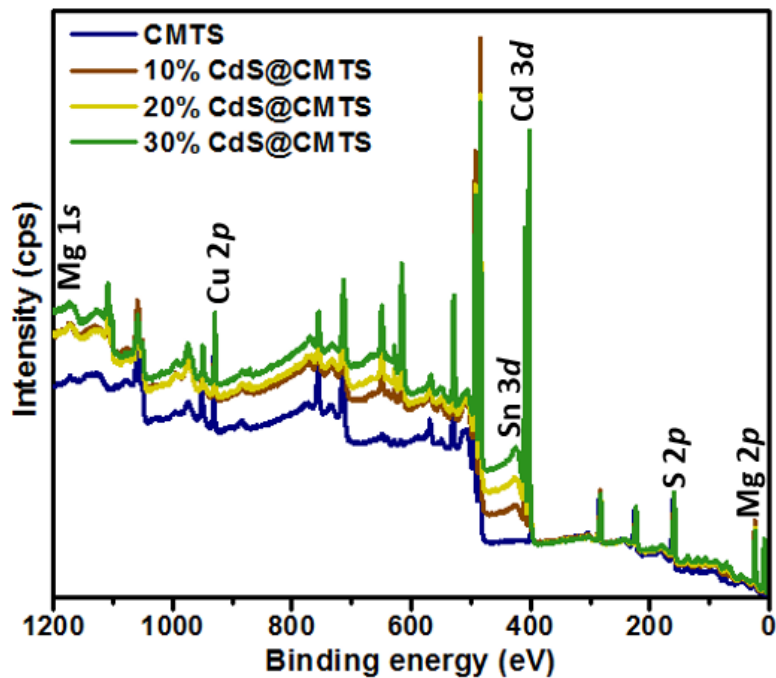

**Figure S3.** XPS survey spectra of CMTS, 10% CdS@CMTS, 20% CdS@CMTS, and 30% CdS@CMTS.

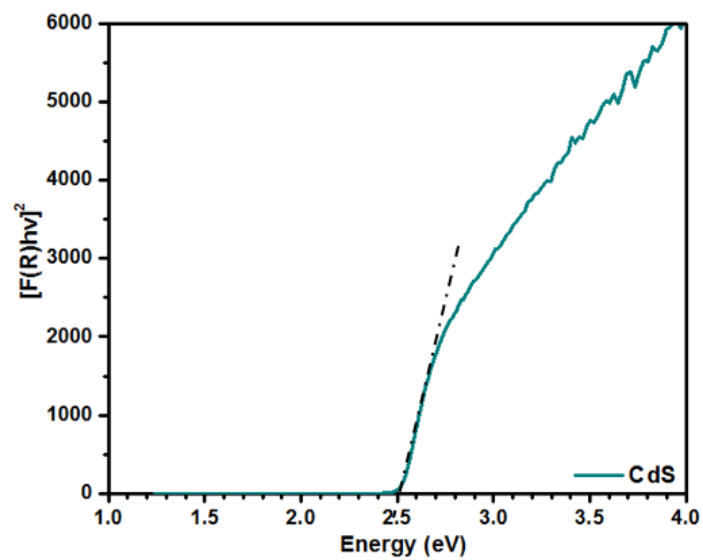

**Figure S4.** Tauc plot constructed from the Kubelka–Munk transformed diffuse reflectance spectrum of CdS.
